1 **Unrelated males in colonies of facultatively social bee**

2 **Short title: Unrelated males in bee colonies**

3

4 **Michael Mikát 1)\*, Daniel Benda 1), Jakub Straka 1)**

5 1) Department of Zoology, Faculty of Science, Charles University, Prague

6 \*Corresponding author: michael.mikat@gmail.com

7

8

## 9 **Abstract**

10 Colonies of social Hymenoptera are usually groups of closely related females, in which the dominant  
11 female(s) is specialized for reproduction and subordinate females care for immature offspring. Kin  
12 selection is thought to be the main factor that supports social cohesion. We have discovered a simple  
13 society of the bee *Ceratina chalybea* with an average of 4.68 colony members that cannot be  
14 maintained by kin selection alone. These colonies consisted of old reproductive female, young adults  
15 and provisioned brood cells. About half of young adults are unrelated to the old female, and almost  
16 all of the young adults are male. The old female provisions new brood cells, while continuing to feed  
17 young adult offspring. As young adults do not perform demanding or risky activities, they incur little  
18 or no cost, but they do benefit from the food they obtain from the old female.

19

## 20 **Introduction**

21 Cooperation between individuals is one of the most interesting biological phenomena. Several  
22 mechanisms of cooperation have been proposed [1–4], but it is thought that kin selection is the main  
23 mechanism driving the organization of societies [5–7]. This theory claims that the spreading of alleles  
24 through one's own reproduction is equivalent to the spreading of alleles by related individuals [6,8].  
25 The strength of kin selection is strongly influenced by relatedness – any help provided to another  
26 individual is only beneficial if the cost of helping that individual is lower than the benefit of the help  
27 received multiplied by the relatedness between the individuals [6,9]. Another mechanism of  
28 cooperation that has been postulated is based on reciprocity: the cost of helping is compensated by  
29 the predicted future benefit [1,3]. Alternatively, cooperation may be a by-product of selfish  
30 behaviour [4]. Recently, the plausibility of group selection has been disputed – sacrificing individuals  
31 for group benefit can exist as an adaptive feature [5,10,11].

32 Colony members in almost all social insects are related [7,9,12]. Cooperation of unrelated individuals  
33 occurs under specific conditions and some derived states [13,14]. Pleometrosis (nest founding by  
34 multiple females) is one of the most common situations in which unrelated members of a colony  
35 cooperate [13,15]. In many wasp and bee societies, some proportion of drifting workers have been  
36 recorded [14,16]. These workers originate from foreign colonies and are therefore not related to the  
37 original nest members [14]. Unlike eusocial insects, unrelated helpers are common in cooperative  
38 breeding vertebrates [2].

39 Societies of the eusocial Hymenoptera are mostly composed of females because the queens and  
40 workers are female [17,18] and most males die soon after mating, not participating in the life of the  
41 society [18–20]. Exceptions, such as male participation in care, are rare among eusocial societies and  
42 male helpers usually have only a minor role in colony life [21–23].

43 The traditional division of labour in hymenopteran societies is between the queen, who performs  
44 most or all egg-laying, and the workers, who are responsible for other tasks, especially food  
45 provisioning [18,24]. However, in small societies that are composed of one reproductively dominant  
46 female and one, or a few other females, a different type of task division is possible. The dominant  
47 female can perform egg-laying as well as food provisioning, with the reproductively subordinate  
48 female(s) performing nest guarding and other tasks in the nest [25]. This system of provisioning by  
49 the reproductively dominant female is typical for Xylocopinae bees [25,26].

50 Here, we examined social nests of the small carpenter bee, *Ceratina chalybea*. Small carpenter bees  
51 from the genus *Ceratina* make their nests in broken twigs with soft pith [27]. The female excavates a  
52 burrow in the pith and later provisions the brood cells [28,29]. After completion of cell provisioning,  
53 the female usually guards the offspring until they reach adulthood [29–31]. Subsequently, she  
54 provisions newly emerged offspring with pollen and nectar [31–33]. Although most temperate  
55 *Ceratina* are solitary [30,34], they belong to the Xylocopinae family, which is ancestrally facultatively

56 social, with obligate solitary nesting being a derived state [35]. Social nests of *Ceratina* contain a few  
57 females, usually two but sometimes as many as four [36,37].

58 Until now, *C. chalybea* was thought to be a solitary bee [30]; however, here we present the first  
59 evidence of social nesting in this species. In contrast to most *Ceratina* bees, the females of this  
60 species did not obligately guard their offspring until adulthood, rather females had two alternative  
61 strategies – either guarding or abandoning the nest after provisioning of brood cells is finished [30].  
62 Clearly, mothers can only perform provisioning of young adults in guarded nests and only these nests  
63 can develop into eusocial colonies. Here, we describe the social nests of *C. chalybea*. Moreover, we  
64 tested relatedness between colony members. We try examine possible costs and benefits for  
65 reproductive dominant and subordinate colony members.

66

## 67 **Methods**

### 68 **Study site**

69 We performed field research at the Havranické vřesoviště (coordinates 48°48'32.6"N 15°59'33.6"E)  
70 location, near the village of Havraníky, in Podyjí National park. This location is situated in the  
71 Southern Moravian region of the Czech Republic. The main experiments were performed in the years  
72 2015 and 2017, but additional data are also presented from the years 2013 and 2018. Office of Podyjí  
73 National park permitted this research.

74

### 75 **Preparation of nesting opportunities**

76 We studied nests made in artificial nesting opportunities. The nesting opportunities were made from  
77 cut twigs with pith, from the following plant species: *Solidago canadensis*, *Helianthus tuberosus*, or  
78 *Echinops sphaerocephalus*. Twenty twigs were tied together into a sheaf and fixed to the ground with

79 a bamboo rod. We distributed more than 20,000 nesting opportunities (1000 sheaves) each year. In  
80 2013 and 2015, we collected nests directly from the nesting opportunities. In 2017 and 2018, some  
81 nests were collected directly from sheaves at nesting site and other nests were taken from original  
82 sheaves and transport to study plot for observation. Nests were collected and dissected after the  
83 observation period.

84

### 85 **Nest dissection**

86 We collected nests in the evening (after 19:00) to ensure that all inhabitants would be present inside  
87 the nest. We stored nests in a fridge between collection and dissection. We opened nests using a  
88 knife or clippers, and for each nest we recorded the presence of all adults and non-adult juveniles  
89 (eggs, larvae and pupae). For adults, we noted sex and age (parental vs filial generation). The age of  
90 adults was easily recognized because adults of the parental generation had extensive wear to their  
91 wings. All nests had only one old female. For non-adult juveniles, we recorded the stage and position  
92 of its brood cell in the nest. We also recorded the number and position of any empty cells (cells  
93 without provisions or offspring, [30]). We measured the length of the nest. We distinguished  
94 between new nests and reused nests. Reused nests had adult excrements in the lower portion and  
95 unsettled fillings below newly provisioned brood cells (Fig.1). For reused nests, we measured the  
96 length of the actively used portion (from the lowest newly provisioned brood cell to the nest  
97 entrance). Most of our analyses are based on nests in the late phase of the nesting season, between  
98 July 15th and August 15th each year).

99

### 100 **Classification of nest stage**

101 We only used active brood nests for our analyses. Active brood nests were an outermost brood cell  
102 containing a pollen ball or an egg; therefore, all nests that were currently provisioned. We

103 distinguished two types of nests: solitary nests and social nests. Solitary active brood nests  
104 contained only a mother and the provisioned brood cells, no young adults. Social nests usually  
105 contained a mother and always had at least one young adult in addition to the provisioned brood  
106 cells. All together, between July 15th and August 15th we collected 28 social active brood nests (19 in  
107 2015 and 9 in 2017) and 39 solitary active brood nests (19 in 2015 and 20 in 2017). We also classified  
108 some nests as full brood nests. Full brood nests were those in which brood cell provisioning had  
109 already been completed (the innermost brood cell contained a larva or pupa). Adult offspring are not  
110 yet present in these nests, or if they are present, they have not crawled through the nest partitions.

111

#### 112 **Observation of social nests**

113 We transported the nests used for observation to special study plots. Transport of these nests was  
114 performed in the evening to ensure that all inhabitants were inside the nest. Each study plot  
115 contained 24 nets. Here, we only present the results from social *C. chalybea* nests; however, we  
116 observed these nests along with nests of other stages and species. Each nest was observed for one  
117 observational day, between 8:00 and 16:00 CEST on days with suitable weather. Each plot was  
118 observed for the entire time by at least one observer but most of the time there were two observers  
119 present. We marked foraging bees with an oil marker (Uni Paint) on the abdomen. We recorded the  
120 departure and arrival of foraging bees and noted when adults only departed from a nest (did not  
121 return) or newly arrived to a nest. It was necessary to cover the nest entrance with a transparent cup  
122 after every arrival of a bee so that the subsequent departure could be observed, since departure is  
123 usually very fast. This allowed us to verify whether the bee had been marked previously or if not, to  
124 mark it. Nests were dissected after their observational day. We performed this experiment in 2017.  
125 We successfully observed 4 social nests of *C. chalybea* per observational day. Two other nests were  
126 observed for only a partial day, due to inclement weather conditions.

127

128 **Analysis of relatedness between individuals in the nest**

129 We previously developed microsatellites for *C. nigrolabiata* [38], which we also used for the analyses  
130 of *C. chalybea*. We used the Chelex protocol for DNA isolation. We isolated DNA from the whole body  
131 of eggs and larvae, or the abdomen of pupae and adults. We added 4-8  $\mu$ l proteinase K and 50  $\mu$ l of  
132 10% Chelex suspension in ddH<sub>2</sub>O to dried samples. We mixed the suspension and heated it to 55°C  
133 for 45 min, then to 97°C for 8 min in a thermocycler (BioRad). We centrifuged the samples and froze  
134 the supernatant for further use.

135 We used the Type-it Multiplex PCR Master Mix (Quiagen) for multiplex PCR according to the  
136 manufacture's protocol. We used primers for ten microsatellite loci ([38], SI Appendix) at a  
137 concentration of 0.05  $\mu$ mol/l. We used the following settings for PCR: 95°C for 15 minutes; 30 cycles  
138 of 94°C for 30 s, 60°C for 90 s, 72°C for 60 s; and finally, 60°C for 30 min.

139 We mixed 0.8  $\mu$ l of PCR product with 8.8  $\mu$ l of formamide and 0.4  $\mu$ l of marker Liz 500 (Applied  
140 Biosystems). We heated the mixture to 95°C for 5 min and let it cool down. Fragmentation analysis  
141 was performed on a 16 capillary sequencer at the Laboratory of DNA sequencing at the Faculty of  
142 Science, Charles University. We used GeneMarker1.91 software (SoftGenetics, State College,  
143 Pennsylvania, USA) for the identification of alleles. Usually, this software correctly identified alleles;  
144 however, sometimes manual correction of the size scanner and identification of alleles was  
145 necessary.

146 From the 10 loci we used, 9 provided successful products and all were polymorphic, although  
147 polymorphism was highly variable between loci. Loci had between 2 and 33 alleles. Allele frequencies  
148 are summarized in [38]. We tested relatedness in 12 social nests. All these nests were collected in  
149 2015. Together, we analyzed 12 old females, 21 non-adult juveniles (15 females and 6 males) and 52  
150 young adults (5 females and 47 males).

151

152 **Analysis of relatedness between mother and young adults**

153 In social nests, we used two methods to determine if young individuals in the nest (young adults and  
154 also non-adult juveniles) are related to the old female. Primarily, we manually compared the  
155 genotypes of the old female and offspring to determine their loci compatibility. Male offspring  
156 should contain only alleles that the old female has. Female offspring should share at least one  
157 identical allele with the old female at each locus. We counted the number of loci that had alleles that  
158 were incompatible with the maternal genotype. We also assessed the relatedness of young adults  
159 and offspring in Kinship software [39] using the following analysis: Kinship analysis, relatedness  
160 option (Pairwise relatedness: Kinship). As offspring could have a coefficient of relatedness as high as  
161 0.5 and unrelated individuals could have a relatedness coefficient as low as 0, we used 0.25 as the  
162 cut-off for related individuals. All offspring below this cut-off were considered unrelated to the old  
163 female.

164

165 **Testing the maternity of young adult females**

166 To determine the compatibility of young adult females with possible offspring (non-adult juveniles),  
167 we counted the number of incompatible loci – loci in the offspring that only had alleles that could not  
168 have been inherited from the young adult. We compared the number of loci with incompatible loci  
169 between non-adult juveniles and young adult females with the number of incompatible alleles  
170 between non-adult juveniles and old females. We also compared the relatedness calculated by  
171 Kinship software between non-adult juveniles and young adult females with the number of  
172 incompatible loci between non-adult juveniles and old females.

173

174 **Testing the paternity of young adult males**



175 We used colony software [40] to test the paternity of young adult males (to the non-adult female  
176 offspring) in social nests. Settings in Colony software were: Mating system – Female polygamy, Male  
177 polygamy, without inbreeding; Species – Dioecious, Haplodiploid; Length of run – Very long; Analysis  
178 method – FL; Likelihood precision – High. For other options, default settings were used. The locus  
179 feature was set as all loci codominant. The probability of genotyping error was 0.01; the probability  
180 of other errors (for example, mutations) was 0.001 for each locus. The old female was set as the  
181 known mother.

182

### 183 **Statistics**

184 All statistical analyses were performed in R software [41]. To test the relationship between sociality  
185 and nest reuse, we used Fisher's exact test. We tested for differences between social and solitary  
186 nests with the year as a covariable (model equations were: feature of nest ~ year\*sociality). For  
187 length of nest, length of nest entrance, and number of brood cells, a linear model was used. For the  
188 proportion of empty cells, a generalized linear model of binomial family was used. It was impossible  
189 to test sociality and nest reuse in one model together because both factors were strongly correlated.  
190 Therefore, we fitted a primary model with sociality (feature of nest ~ year\*sociality) and a secondary  
191 model with nest reuse (feature of nest ~ year\*nest reuse). We compared the Akaike information  
192 criteria (AIC) between models with sociality and models with nest reuse for all four tested features of  
193 nests. We compared the relatedness between non-adult juveniles and young adult females with the  
194 relatedness between non-adult juveniles and old females. We tested differences in the number of  
195 incompatible loci by paired Wilcoxon test. We tested differences in relatedness by paired t-test.

196

197

### 198 **Results**

199 **Evidence for social nesting**

200 In the first part of the nesting season (until July 15<sup>th</sup>), we only observed solitary nests (2013 N=90;  
201 2015 N = 22; 2017 N = 5; 2018 N = 19). None of these nests were reused from the previous season.  
202 However, we did find social nests later in the *C. chalybea* nesting season, after the 15<sup>th</sup> of July. In  
203 total, we found 28 social nests. After July 15<sup>th</sup>, half of the active brood nests we found in 2015 were  
204 social nests (19/38, Table 1) and 31.03% (9/29) of the active brood nests we found in 2017 were  
205 social nests. In 2013 and 2018, all dissected active brood nests were solitary (N=25, 2013; N=26,  
206 2018). One social full brood nest was found in 2018.

207 On average, social nests contained 3.68 young adults (4.15 in 2015 and 2.66 in 2017, Table 2), and  
208 the maximum number recorded was 9. Most of the young adults were male (89.32%, 92/103). The  
209 reproductive female was present in most nests (82.14%, 23/28), but some social nests had been  
210 orphaned.

211 Table 1. The number of solitary and social active brood nests in different years. Only nests collected  
212 between 15 July and 15 August are included.

| Sociality | Solitary nest |    |     | Social nest |    |     | Total |          |
|-----------|---------------|----|-----|-------------|----|-----|-------|----------|
|           | Nest reused?  | No | Yes | Together    | No | Yes |       | Together |
| 2013      |               | 23 | 2   | 25          | 0  | 0   | 0     | 25       |
| 2015      |               | 15 | 4   | 19          | 3  | 16  | 19    | 38       |
| 2017      |               | 15 | 5   | 20          | 2  | 7   | 9     | 29       |
| 2018      |               | 23 | 3   | 26          | 0  | 0   | 0     | 26       |
| Total     |               | 76 | 14  | 90          | 5  | 23  | 28    | 118      |

213

Table 2: Number of young adults in *C. chalybea* social nests

| Year                                   | 2015   | 2017   | Together |
|----------------------------------------|--------|--------|----------|
| N nests analyzed                       | 19     | 9      | 28       |
| Average number of young adults         | 4.16   | 2.67   | 3.68     |
| Maximum number of young adults         | 9      | 6      | 9        |
| Minimum number of young adults         | 2      | 1      | 1        |
| SD of young adults                     | 2.09   | 1.41   | 2.00     |
| Average number of young adults females | 0.26   | 0.67   | 0.39     |
| Average number of young adult males    | 3.89   | 2.00   | 3.29     |
| Proportion of males in young adults    | 0.9367 | 0.7500 | 0.8932   |

214

#### 215 **Comparison between solitary and social nests**

216 We compared the nest architecture of solitary and social active brood nests. There was a strong  
217 association between social nesting and nest reuse: only 15.55% (14/90, Table 1) of solitary nests  
218 were reused in comparison to 82.14% (23/28, Table 1) of social nests. This association was significant  
219 for both years (Fisher exact test; 2015 –  $p = 0.0002$ ,  $N = 38$ ; 2017 –  $p = 0.0140$ ,  $N = 29$ ).

220 Solitary and social active brood nests did not differ in total nest length (linear model,  $F = 0.81$   $p =$   
221  $0.3713$ ,  $N = 67$ ), but they did significantly differ in the length of the actively used portion of the nest  
222 (linear model,  $F = 17.34$ ,  $p < 0.0001$ ,  $N = 67$ ). This result held true when we used nest reuse as the  
223 explanatory variable instead of sociality (total nest length did not differ – linear model,  $F=2.28$ ,  $p =$   
224  $0.135$ ,  $N = 67$ ; but the actively used portion of the nest did significantly differ in length – linear  
225 model,  $F = 43.85$ ,  $p < 0.0001$ ,  $N=67$ ). When we compared the AIC of both models, nest reuse was  
226 better than sociality as an explanatory variable. There are fillings and excrement from previous  
227 instances of nesting at the bottom of reused nests; therefore, the length of the effectively used space  
228 is shorter (fig. 1).

229 We also found a difference in the number of brood cells provisioned. Social nests had significantly  
230 fewer provisioned brood cells (linear model,  $F = 7.21$   $p = 0.0093$ ,  $N = 67$ , Table 3). When we tested  
231 nest reuse as an explanatory variable instead of sociality, the difference was also significant (linear  
232 model,  $F = 5.25$ ,  $p = 0.0253$ ,  $N = 67$ ); however, the model using sociality had a better AIC than the  
233 model with nest reuse.

234 We also found a difference in the presence of empty cells. In almost all cases, brood cells were  
235 separated by empty cells in solitary nests, but they were often adjacent in social nests. The  
236 proportion of cells that were empty was significantly lower for social nests compared to solitary nests  
237 (Binomial glm, deviance = 7.99, residual deviance = 27.73,  $p = 0.0047$ ,  $N = 67$ , Table 3). When we  
238 tested nest reuse as the explanatory variable instead of sociality, there was also a significant  
239 difference (Binomial glm, deviance 5.97, residual deviance = 29.78,  $p = 0.0146$ ,  $N = 67$ ); however, the  
240 model using sociality had a better AIC than the model with nest reuse.

241

242 Table 3: Comparison of social and solitary active brood nest characteristics. Only nests collected  
243 between 15 July and 15 August are included.

| Nest Type                        | Solitary active brood nests |       |          | Social active brood nests |       |          | All nests |
|----------------------------------|-----------------------------|-------|----------|---------------------------|-------|----------|-----------|
|                                  | 2015                        | 2017  | Together | 2015                      | 2017  | Together |           |
| Year                             |                             |       |          |                           |       |          |           |
| Number of Nests Analyzed         | 19                          | 20    | 39       | 19                        | 9     | 28       | 67        |
| Total Length of Nest – mean      | 24.53                       | 23.32 | 23.91    | 24.31                     | 26.83 | 25.12    | 24.41     |
| Length of Nest Used – mean       | 22.97                       | 20.98 | 21.95    | 14.23                     | 17.30 | 15.21    | 19.13     |
| Number of Brood Cells – mean     | 3.58                        | 2.95  | 3.26     | 2.21                      | 2.44  | 2.29     | 2.85      |
| Proportion of Cells Empty – mean | 0.52                        | 0.56  | 0.54     | 0.33                      | 0.38  | 0.34     | 0.46      |

244

245 Fig. 1: Reused nest of *C. chalybea*. From left to right there are: fillings with excrements of larvae,  
246 excrements of young adults, an empty cell, the pollen ball of a brood cell currently being provisioned.

247

248

249 **Foraging activity in social nests**

250 We recorded high foraging activity in social nests, which were observed for a full day (mean = 16.5  
251 foraging trips for a day, range = 12–20, N = 4 nests). In all cases, only one female performed regular  
252 foraging activity. We also observed two additional nests per part of day. In one nest, foraging activity  
253 was performed by reproductive female and in second nest no activity was recorded. We did not  
254 observe any young adults performing foraging activity; however, we did note the emigration of  
255 young adults who did not return to the nest (mean = 1.25 for a day and nest, range = 0–2, N = 4  
256 nests). There was also one case of immigration by a young adult (observed entering the nest without  
257 having previously departed).

258

259 **Relatedness in social nests**

260 **Relatedness between the old female and non-adult juveniles (eggs and larvae):** Software analysis in  
261 Kinship software concluded that all non-adult juveniles were related to the old female. However,  
262 manual comparison of genotypes showed, that one individual had one locus with one allele that  
263 could not have been inherited from the old female. Therefore, non-adult juveniles had all loci  
264 compatible with the old female's genotype (95.23%; N = 21, Fig. 2).

265

266 Fig. 2: Histograms showing relatedness between the old females and other members of the societies.  
267 A) Number of incompatible loci between the old females and non-adult offspring (eggs and larvae),  
268 N=21. B) Number of incompatible loci between the old females and young adults, N=52. C)  
269 Relatedness between the old females and non-adult offspring (eggs and larvae), calculated using

270 Kingroup software, N=21. D) Relatedness between the old females and young adults, calculated using  
271 Kingroup software, N=52.

272

273 **Relatedness between the old females and young adults:** Young adults were compatible with the old  
274 female's genotype for all loci in 40.39% of cases (21/52, Fig 2); whereas, one locus disagreed with the  
275 old female's genotype in 11.53% of cases (6/52). For the remaining cases (25/52), the genotyped  
276 offspring had more than one locus that disagreed with the old female's genotype. Analysis using  
277 Kinship software showed that 55.77% (29/52, Fig 2) of young adults were related to the old female  
278 and 44.23% (23/52, Fig 2) were unrelated to the old female. Therefore, we assume that between  
279 44.23% and 59.61% of young adults are unrelated to the old female.

280 **Relatedness between young adult females and non-adult juveniles:** Young adult females were only  
281 present in 3 out of 12 nests that were genetically analyzed. We compared the relatedness between  
282 young adult females and non-adult juveniles with the relatedness between the old female and non-  
283 adult juveniles. There were 9 possible pairs of non-adult juveniles and young adult females for  
284 evaluation. In 22.22% (2/9) of these possibilities, non-adult juveniles had all loci compatible with  
285 maternity of the young adult female; whereas, one locus was incompatible in 33.33% (3/9) of cases  
286 and more than one locus was incompatible in 44.44% (4/9) of cases. The genotype of non-adult  
287 juvenile offspring was compatible with maternity of the old female in all loci. Therefore, non-adult  
288 juveniles have significantly higher compatibility with the genotype of the old female than the young  
289 adult females (paired Wilcoxon test,  $V = 0$ ,  $p = 0.0206$ ,  $N=9$ ). Also, we found that the relatedness  
290 calculated by Kinship software of non-adult juveniles was higher to old female than young adult  
291 females (paired t-test,  $t = 5.77$ ,  $df = 8$ ,  $p = 0.0004$ ,  $N = 9$ ).

292 **Relatedness between young adult males and non-adult juveniles:** We tested the paternity of young  
293 adult males using Colony software to determine their relatedness to the non-adult juvenile females.

294 This analysis showed that none of these offspring (N = 15) were fathered by any of the young adult  
295 males. In all cases, the probability of paternity was less than 1%.

296

## 297 **Discussion**

### 298 **Sociality in *C. chalybea***

299 We suggest, that social nests of *C. chalybea* fulfill all three of the conditions for eusociality defined by  
300 [24] and [18]: i) reproductive division of labour (only old females reproduce); ii) generation overlap  
301 (adults of the parental and filial generations are present); and iii) cooperative brood care (adult  
302 members of the colony cooperate in guarding, helping young offspring survive) are all present.

303 We confirmed the old female's dominant reproductive role by microsatellite analysis. In all but one  
304 case, the genotypes of non-adult juveniles were compatible with maternity of the old female. We  
305 suppose that the single locus incompatibility in this one individual is due to a genotyping error or  
306 mutation. Young adult females were rarely present in social nests and their maternity is less probable  
307 than the maternity of the old female. We also tested that young adult males do not father non-adult  
308 juveniles. Therefore, we demonstrated that the old female strongly (probably exclusively) dominates  
309 reproduction in social nests and it is highly likely that no other members of the colony reproduce.

310 The most disputable phenomenon is cooperative brood care. The old female performs all offspring  
311 provisioning. We never observed other individuals performing regular foraging activity and we  
312 recorded only an occasional emigration or immigration of young adults. We suppose that the  
313 presence of young adults is beneficial for nest protection because unprotected nests of *Ceratina* bees  
314 [30] and other nest-making social Hymenoptera [42,43] are vulnerable to invasion and destruction.

315 Social nesting was strongly associated with nest reuse in *C. chalybea*. Nest reuse is generally  
316 considered a key factor for the development of sociality in *Ceratina* [36,37,44]. Although nest reuse  
317 can be an important factor influencing nest structure in social nests, we showed that sociality itself is

318 a better predictor for the number of brood cells provisioned and the proportion of empty cells in a  
319 nest. Therefore, we suggest that at least these aspects of nest use are directly affected by sociality  
320 and not only the effects of nest reuse.

321

## 322 **Comparison with other insect societies**

323 The social structure of *C. chalybea* is unusual among social insects for several reasons: i) the presence  
324 of young adult males, ii) an unusually high proportion of unrelated colony members, and iii)  
325 reproductive subordinate individuals perform only nest guarding (not provisioning).

326 Almost all (89%) members of *C. chalybea* societies are males. This is interesting because in general,  
327 males have a very minor role in the Aculeate Hymenoptera [17,19,20]. A few biparental species are  
328 known, in particular crabronid wasps from the genus *Trypoxylon* [45,46] and *Ceratina nigrolabiata*  
329 [38]. In almost all eusocial species, males are a small minority among the colony members and have a  
330 marginal role in comparison to female workers [21,47]. An interesting exception is the crabronid  
331 wasp, *Misrostigmus nigrophthalmus*, in which a high proportion of colony members are male, actively  
332 participating in nest defense. They are even able to perform this task in the absence of female  
333 helpers [22]. But it remains unknown why male participation in eusocial societies is so rare.  
334 Phylogenetic constraints might be one explanation. The solitary ancestors of social species have  
335 female care without male participation [17,18,20]. Males lack some morphological structures, such  
336 as hairs for pollen collection and a sting, which are important for working effectively in eusocial  
337 societies [20,48]. Uncommon male behaviours may arise from performing a task or a standard  
338 behaviour with a different primary purpose. In our case, it is likely that males can help with nest  
339 protection because they primarily block the nest entrance in self-defense. Regardless of how it  
340 occurs, this behavior does lead to effective nest guarding.

341 We determined that about half of the young adults are unrelated to the old female in *C. chalybea*  
342 societies. There exist various mechanisms for arising of insects societies composed of unrelated



343 members, such as pleometrosis [13,15], adopting of orphaned brood [49] or exchange of individuals  
344 between neighbour colonies [14]. We can exclude the possibility of pleometrosis for *C. chalybea*,  
345 because we never found more than one old female in the nest. Adoption of an unrelated brood is  
346 possible because nest usurpation and brood removal do occur in *C. chalybea*; however, it is rare and  
347 only occurs with orphaned nests [30]. Therefore, incomplete brood removal cannot explain the large  
348 proportion of unrelated young adults in nests of *C. chalybea*. Thus, it is very likely that the unrelated  
349 individuals in *C. chalybea* nests originate from neighbouring nests. We frequently observed young  
350 adults emigrating from and immigrating to nests; therefore, we consider unrelated individuals to be  
351 drifting from other nests.

352 The reproductively dominant (old) female in *C. chalybea* nests performs all foraging and  
353 reproduction. Young adults are passive; they do not perform any regular foraging trips. This type of  
354 division of labour is generally uncommon in eusocial Hymenoptera [18,24], but it is usual for  
355 Xylocopine bees [25,26,37]. In *C. chalybea*, we found the direct opposite of classical queen-worker  
356 task division: the *C. chalybea* old reproductive female performs all foraging trips and young adults  
357 (reproductive subordinates) only perform guarding. This is different from Allodapine bees, where  
358 multiple females commonly perform some foraging [50], and also from east Asian *Ceratina* of the  
359 subgenus *Ceratinidia*, where dominance of reproduction is unstable [51,52]. A direct contradiction of  
360 the classical queen-worker roles (foraging dominant, passive subordinate) does occur in *Xylocopa*  
361 [26,51,53]. However, in *Xylocopa sulcatipes* societies with a larger number of adult members (about  
362 6), foraging is performed by multiple individuals [53]. Therefore, we have probably found a  
363 Hymenopteran society with the lowest proportion of foraging individuals.

364

365 **Benefits for young adults**

366 Subordinate members of insect societies usually benefit from indirect fitness [6,9,11]. However,  
367 direct fitness benefits, such as the possibility of inheriting a dominant position [25,26,54] or direct  
368 reproduction [55,56], can also be important.

369 Indirect fitness benefits only occur with non-zero relatedness between the donor and acceptor [6].  
370 However, we have shown that about half of the young adults are unrelated to the old female.  
371 Moreover, previous work indicates that *C. chalybea* has a multiple mating strategy [38], which is  
372 unusual in simple hymenopteran societies [7]. Drifting individuals and multiple mating generate very  
373 low relatedness between colony members. Half of the colony members, those that are unrelated,  
374 cannot gain any indirect fitness benefit from helping. Furthermore, the other half of the colony  
375 members, those that have non-zero relatedness to the colony's young adults, might only gain a small  
376 indirect fitness benefit due to the lower productivity of social nests in comparison to solitary nests.

377 The possibility for nest inheritance is an important selection factor for the cooperation of unrelated  
378 members in small insect societies [54]. Generally, in Xylocopinae bees, nest inheritance is probably a  
379 very important driver [25,56]. However, in the case of *C. chalybea* this cannot be an important factor  
380 for the retention of sociality, because most of the young adults are male and nest-loyal biparental  
381 behaviour is unknown in this species [38]. Additionally, as we did not observe any case of nest reuse  
382 from the previous season, therefore we suppose that each female will build new nest next year. For  
383 these reasons, we can exclude benefits from nest inheritance as a reason for sociality in the case of  
384 *C. chalybea*.

385 Reproductively subordinate colony members can sometimes directly reproduce in small  
386 hymenopteran societies [54,57]. These individuals drifting to foreign nest frequently benefit from  
387 direct reproduction and commonly reproduce more than domestic workers [55,58]. However, based  
388 on our evidence, it is clear that the old female strongly dominates reproduction in *C. chalybea*  
389 societies and reproduction by young adults is negligible or zero. Therefore, direct reproduction  
390 cannot be an important motivation for a young adult to stay.

391 Care of adult offspring is an unusual trait among insects [59], but it is common in Xylocopinae bees  
392 [33]. It is likely that young adults remain in their nests because they benefit from the food provided  
393 by old female. Long-term cohabitation between an old female and young offspring is a widespread  
394 feature in *Ceratina* bees [29]. Many studies of solitary nests have shown that the mother provides  
395 pollen and nectar for her young adult offspring [28,31–33]. We argue that social nests arise from  
396 nests where mothers feed their adult offspring: first, the mother feeds mature offspring and then she  
397 begins to provision new brood cells. However, this strategy can have a significant cost. As  
398 provisioning of young adults continues along with providing for new offspring, the mother must  
399 divide her resources between the new brood cells and adult offspring; therefore, the amount of food  
400 that can be allocated for brood cell provisioning and thus the number of new brood cells is  
401 decreased. We observed that the pollen ball in the outermost (open) brood cell, which was currently  
402 being provisioned, had an atypical shape in some social nests. We suppose that this pollen ball is  
403 partially eaten by young adults. Simultaneous provisioning of brood cells and feeding of young adults  
404 has also been documented for *Xylocopa pubescens*. Maternal care of young adults is an important  
405 benefit for them [26,60].

406 Cooperation between organisms is dependent on the costs-benefits ratio [6]. When little cost occurs,  
407 little benefit is required to maintain stable cooperation. Young adults of *C. chalybea* do not perform  
408 foraging, which is a very risky task for workers in most social insects [18,61]. It is likely that the  
409 presence of young adults in *C. chalybea* nests has few costs, because it does not reduce their lifetime  
410 reproduction. Females of *C. chalybea* [30] and also other temperate *Ceratina* species do not  
411 reproduce before overwintering [29]. Males of temperate *Ceratina* bees survive through the winter  
412 and usually mate in the season after overwintering [31,38]. Therefore, remaining in the nest probably  
413 has little or no cost to future reproductive success and consequently, only a small amount of benefit  
414 is required for young adults to remain.

415

416 **Benefits for the old female**

417 There was exceptionally low productivity in social nests of *C. chalybea*. In total, there were fewer  
418 brood cells provisioned in social nests than in solitary nests. This differs from other social species,  
419 where the overall productivity of social nests is either higher [43,62] or at least the same as solitary  
420 nests [44,63]. Contrary to workers in large societies, young adults in *C. chalybea* nests did not leave  
421 to perform foraging; rather, they stayed inside their nest. However, non-foraging individuals can be  
422 beneficial for the society in other ways. It has been shown that the presence of guards in the nest can  
423 be effective protection against pollen robbery by conspecific females in *Xylocopa* [26] or nest  
424 usurpation [56].

425 In comparison to solitary nesting, social nesting decreases the risk of total nest destruction [56,64]. In  
426 the case of *C. chalybea*, removal of the mother from completely provisioned solitary nests  
427 significantly decreases the survival of offspring due to attack by natural enemies [30]. Therefore, the  
428 presence of young adults can be a benefit because they are able to protect the younger cohort of  
429 offspring. Young adults can serve the nest community through two mechanisms: i) reducing or  
430 eliminating the trade-off between nest guarding and offspring provisioning, and ii) at least  
431 temporarily, protecting the nest after the death of the mother. It has been shown that social nesting  
432 allows for more effective foraging in multiple facultatively eusocial species [26,65]. We did not test  
433 the effectiveness of young adult guarding experimentally; however, we did find a difference between  
434 solitary and social nests in their architecture. In social nests, empty cells were significantly less  
435 frequent than in solitary nests. Empty cells are thought to be an adaptation for protection against  
436 parasite attack [66]. Therefore, in social nests, the presence of young adults can protect against  
437 attack and the old female are able to reduce the number of empty cells, allowing more space for  
438 provisioned offspring. We observed that young adults were present in some *C. chalybea* nests from  
439 which the mothers had already vanished. As these young adults are located in the nest entrance,  
440 they can protect the brood cells against potential intruders.

441 It is possible that there was low nesting productivity in social nests because a significant proportion  
442 of pollen and nectar was consumed by the young adults and, therefore, could not be used to build  
443 brood cells. As about half of the young adults are related to the old female, feeding of young adults  
444 alongside brood provisioning can be beneficial for her reproductive success because this supports  
445 their survival [32]. From the old female's view, social nesting can be interpreted as maternal care for  
446 two cohorts of offspring simultaneously: a new cohort of offspring in the brood cells and an old  
447 cohort of young adult offspring. However, it is unclear why the old female tolerates unrelated young  
448 adults in the nest. One possibility is that it may be difficult to discriminate between alien and own  
449 offspring. In *C. calcarata*, the mother can discriminate between nestmate and non-nestmate young  
450 females [67]; however, overall aggression among individuals in mature brood nests is generally low,  
451 and when it does occur, it is more often against nestmate than non-nestmate young females [67].

452

#### 453 **Implications of *C. chalybea* natural history for social evolution**

454 Our observations support the view that benefits for subordinate colony members in small insect  
455 societies are not, in many cases, primarily connected to inclusive fitness. It is possible for some  
456 females to gain direct fitness benefits, as has been documented in some studies on Xylocopine bees  
457 [25,26]. However, in the case of *C. chalybea*, the main benefits are not in the possibility of nest  
458 inheritance, but in the extended care of mature offspring. The old female provides pollen and nectar  
459 to feed young adults, which helps them survive. The old female tolerates young adults in the nest,  
460 because this can provide the benefit of increased nest protection. Therefore, our study supports the  
461 importance of mutualistic interactions in the evolution of the early stages of sociality.

462 As costs to young adults are low, small benefits are sufficient for the maintenance of sociality. We  
463 suppose that young adults mainly benefit from the food provided by the old female. Young adults  
464 can help with protection against natural enemies; however, their primary motivation for this is  
465 probably passive (self-defense). Although the observed society fulfills the definition of eusociality

466 proposed by [18,24], the motivation for the behavior of colony members is mainly selfish. Therefore,  
467 the society of *C. chalybea* is something between eusociality and a two-cohort maternal subsociality.  
468 Unrelated young adults can be considered parasites, as they take food resources from the old female  
469 Eusociality is ancestral state for all Xylocoinae bees with strict solitariness being a derived strategy [35].  
470 The unusual social organization of *C. chalybea* has some traits in common with typical Xylocopine  
471 social organization, especially the presence of unrelated colony members [56,68] and passive  
472 reproductively subordinate individuals [25,51]; however, in the quantity of these features, *C.*  
473 *chalybea* is extreme, even among species of the subfamily Xylocopinae. Furthermore, *C. chalybea*  
474 society is unique in its inclusion of male colony members.

475 Here, we have shown that eusociality in bees can be maintained even when the relatedness between  
476 colony members is very low and indirect as well as direct fitness benefits (i.e. the possibility of nest  
477 inheritance) play small roles. In this case, eusociality is supported by specific natural-history traits  
478 (i.e. feeding pollen and nectar to mature offspring and nest reuse). Thus, our results show that good  
479 knowledge of natural history is important for interpreting social evolution.

480

481

## 482 **Acknowledgements**

483 We are grateful to all of the people who helped us with field experiments: Votěch Brož, Kateřina  
484 Čermáková, Marcela Dokulilová, Antonín Hlaváček, Lukáš Janošík, Karel Kodejš, Celie Korittová, Eva  
485 Matoušková, Zuzana Matějková, Blanka Mikátová, Daniela Reiterová, Jitka Waldhauserová, Šimon  
486 Zeman. We are also grateful to Podyjí National Park for permitting our research and for their  
487 friendliness. We also thank the Catholic Priest, Marian Hušek, for accommodation during our field  
488 research in the rectory in Havraníky village.

489 The Grant Agency of Charles University in Prague (Grant GAUK 764119/2019) and the Specific  
490 University Research project Integrative Animal Biology (Grant SVV 260434/2018) supported this  
491 research.

492

## 493 **Data Availability**

494 Dataset is available as SI material of this paper.

495

## 496 **Author contribution**

497 MM and JS designed the research; MM, DB and JS performed the research; MM analyzed the data;

498 MM wrote the initial draft of the paper; all authors commented and finalized the paper.

499

## 500 **Competing of interests**

501 The authors declare no competing interests.

502

## 503 **References**

- 504 1. Axelrod R, Hamilton WD. The evolution of cooperation. *Science*. 1981;211: 1390–1396.  
505 doi:10.1126/science.7466396
- 506 2. Clutton-Brock T. Breeding Together: Kin Selection and Mutualism in Cooperative Vertebrates.  
507 *Science*. 2002;296: 69–72. doi:10.1126/science.296.5565.69
- 508 3. Nowak MA. Five Rules for the Evolution of Cooperation. *science*. 2006;1133755: 314.
- 509 4. Sachs JL, Mueller UG, Wilcox TP, Bull JJ. The evolution of cooperation. *Q Rev Biol*. 2004;79: 135–  
510 160.

- 511 5. Abbot P, Abe J, Alcock J, Alizon S, Alpedrinha JA, Andersson M, et al. Inclusive fitness theory and  
512 eusociality. *Nature*. 2011;471: E1.
- 513 6. Hamilton WD. The genetical evolution of social behaviour. I. *J Theor Biol*. 1964;7: 1–16.  
514 doi:10.1016/0022-5193(64)90038-4
- 515 7. Hughes WO, Oldroyd BP, Beekman M, Ratnieks FL. Ancestral monogamy shows kin selection is  
516 key to the evolution of eusociality. *Science*. 2008;320: 1213–1216.
- 517 8. Dawkins R. *The selfish gene*. Oxford university press; 2006.
- 518 9. Bourke AFG. Hamilton’s rule and the causes of social evolution. *Phil Trans R Soc B*. 2014;369:  
519 20130362. doi:10.1098/rstb.2013.0362
- 520 10. Nowak MA, Tarnita CE, Wilson EO. The evolution of eusociality. *Nature*. 2010;466: 1057–1062.  
521 doi:10.1038/nature09205
- 522 11. Strassmann JE, Page RE Jr, Robinson GE, Seeley TD. Kin selection and eusociality. *Nature*.  
523 2011;471: E5–6; author reply E9–10. doi:10.1038/nature09833
- 524 12. Boomsma JJ, Beekman M, Cornwallis CK, Griffin AS, Holman L, Hughes WOH, et al. Only full-  
525 sibling families evolved eusociality. *Nature*. 2011;471: E4–E5. doi:10.1038/nature09832
- 526 13. Bernasconi G, Strassmann JE. Cooperation among unrelated individuals: the ant foundress case.  
527 *Trends Ecol Evol*. 1999;14: 477–482. doi:10.1016/S0169-5347(99)01722-X
- 528 14. Nonacs P. Go High or Go Low? Adaptive Evolution of High and Low Relatedness Societies in  
529 Social Hymenoptera. *Front Ecol Evol*. 2017;5. doi:10.3389/fevo.2017.00087
- 530 15. Queller DC, Zacchi F, Cervo R, Turillazzi S, Henshaw MT, Santorelli LA, et al. Unrelated helpers in  
531 a social insect. *Nature*. 2000;405: 784–787.
- 532 16. Bordier C, Pioz M, Crauser D, Le Conte Y, Alaux C. Should I stay or should I go: honeybee drifting  
533 behaviour as a function of parasitism. *Apidologie*. 2017;48: 286–297. doi:10.1007/s13592-016-  
534 0475-1
- 535 17. Ross L, Gardner A, Hardy N, West SA. Ecology, Not the Genetics of Sex Determination,  
536 Determines Who Helps in Eusocial Populations. *Curr Biol*. 2013;23: 2383–2387.
- 537 18. Wilson EO. *The insect societies*. Cambridge, Massachusetts: Belknap Press of Harvard University  
538 Press; 1971.
- 539 19. Heinze J. The male has done his work — the male may go. *Curr Opin Insect Sci*. 2016;16: 22–27.  
540 doi:10.1016/j.cois.2016.05.005
- 541 20. Starr CK. Enabling mechanisms in the origin of sociality in the Hymenoptera - the stings the  
542 thing. *Ann Entomol Soc Am*. 1985;78: 836–840.
- 543 21. Cameron SA. Brood care by male bumble bees. *Proc Natl Acad Sci*. 1985;82: 6371–6373.
- 544 22. Lucas ER, Field J. Active and effective nest defence by males in a social apoid wasp. *Behav Ecol*  
545 *Sociobiol*. 2011;65: 1499–1504.



- 546 23. Veen JW van, Sommeijer MJ, Meeuwsen F. Behaviour of drones in *Melipona* (Apidae,  
547 Meliponinae). *Insectes Sociaux*. 1997;44: 435–447. doi:10.1007/s000400050063
- 548 24. Michener CD. The social behavior of the bees: A comparative study. Harvard University Press;  
549 1974.
- 550 25. Schwarz MP, Tierney SM, Rehan SM, Chenoweth LB, Cooper SJB. The evolution of eusociality in  
551 allodapine bees: workers began by waiting. *Biol Lett*. 2011;7: 277–280.  
552 doi:10.1098/rsbl.2010.0757
- 553 26. Hogendoorn K, Velthuis HHW. The role of young guards in *Xylocopa pubescens*. *Insectes*  
554 *Sociaux*. 1995;42: 427–448. doi:10.1007/BF01242171
- 555 27. Michener CD. The bees of the world. 2nd ed. The Johns Hopkins University Press; 2007.
- 556 28. Maeta Y, Sugiura N, Goubara M. Patterns of offspring production and sex allocation in the small  
557 carpenter bee, *Ceratina flavipes* Smith (Hymenoptera, Xylocopinae). *JpnJEnt*. 1992;60: 175–  
558 190.
- 559 29. Rehan SM, Richards MH. Nesting biology and subsociality in *Ceratina calcarata* (Hymenoptera:  
560 Apidae). *Can Entomol*. 2010;142: 65–74. doi:10.4039/n09-056
- 561 30. Mikát M, Černá K, Straka J. Major benefits of guarding behavior in subsocial bees: implications  
562 for social evolution. *Ecol Evol*. 2016;6: 6784–6797. doi:10.1002/ece3.2387
- 563 31. Sakagami SF, Maeta Y. Some presumably presocial habits of Japanese *Ceratina* bees, with notes  
564 on various social types in Hymenoptera. *Insectes Sociaux*. 1977;24: 319–343.  
565 doi:10.1007/BF02223784
- 566 32. Lewis V, Richards MH. Experimentally induced alloparental care in a solitary carpenter bee.  
567 *Anim Behav*. 2017;123: 229–238. doi:10.1016/j.anbehav.2016.11.003
- 568 33. Mikát M, Franchino C, Rehan SM. Sociodemographic variation in foraging behavior and the  
569 adaptive significance of worker production in the facultatively social small carpenter bee,  
570 *Ceratina calcarata*. *Behav Ecol Sociobiol*. 2017;71: 135. doi:10.1007/s00265-017-2365-6
- 571 34. Groom SVC, Rehan SM. Climate-mediated behavioural variability in facultatively social bees.  
572 *Biol J Linn Soc*. 2018;125: 165–170. doi:10.1093/biolinnean/bly101
- 573 35. Rehan SM, Leys R, Schwarz MP. A mid-cretaceous origin of sociality in xylocopine bees with  
574 only two origins of true worker castes indicates severe barriers to eusociality. *PLoS ONE*.  
575 2012;7: e34690. doi:10.1371/journal.pone.0034690
- 576 36. Okazaki K. Life cycle of a subtropical xylocopine bee, *Ceratina okinawana*, with some related  
577 problems. *Kontyu*. 1987;55: 1–8.
- 578 37. Rehan, Richards MH, Schwarz MP. Social polymorphism in the Australian small carpenter bee,  
579 *Ceratina (Neoceratina) australensis*. *Insectes Sociaux*. 2010;57: 403–412. doi:10.1007/s00040-  
580 010-0097-y
- 581 38. Mikát M, Janošík L, Černá K, Matoušková E, Hadrava J, Bureš V, et Straka, J. Polyandrous bee  
582 provides extended offspring care biparentally as an alternative to monandry based eusociality.  
583 *Proc Natl Acad Sci*. 2019;116: 6238–6243. doi:10.1073/pnas.1810092116

- 584 39. Konovalov DA, Manning C, Henshaw MT. KINGROUP: a program for pedigree relationship  
585 reconstruction and kin group assignments using genetic markers. *Mol Ecol Notes*. 2004;4: 779–  
586 782.
- 587 40. Jones OR, Wang J. COLONY: a program for parentage and sibship inference from multilocus  
588 genotype data. *Mol Ecol Resour*. 2010;10: 551–555.
- 589 41. R. Core Developmental Team. R: A language and environment for statistical computing  
590 [Computer software]. Vienna: R Foundation for Statistical Computing. 2016.
- 591 42. Kukuk PF, Ward SA, Jozwiak A. Mutualistic benefits generate an unequal distribution of risky  
592 activities among unrelated group members. *Naturwissenschaften*. 1998;85: 445–449.
- 593 43. Smith AR, Wcislo WT, O'Donnell S. Survival and productivity benefits to social nesting in the  
594 sweat bee *Megalopta genalis* (Hymenoptera: Halictidae). *Behav Ecol Sociobiol*. 2007;61: 1111–  
595 1120. doi:10.1007/s00265-006-0344-4
- 596 44. Rehan SM, Richards MH, Adams M, Schwarz MP. The costs and benefits of sociality in a  
597 facultatively social bee. *Anim Behav*. 2014;97: 77–85. doi:10.1016/j.anbehav.2014.08.021
- 598 45. Brockmann HJ. Male behavior, courtship and nesting in *Trypoxylon (Trypargilum) monteverdeae*  
599 (Hymenoptera: Sphecidae). *J Kans Entomol Soc*. 1992; 66–84.
- 600 46. Brockmann HJ, Grafen A. Mate conflict and male behaviour in a solitary wasp, *Trypoxylon*  
601 (*Trypargilum) politum* (Hymenoptera: Sphecidae). *Anim Behav*. 1989;37: 232–255.  
602 doi:10.1016/0003-3472(89)90113-9
- 603 47. Hunt JH, Noonan KC. Larval feeding by male *Polistes fuscatus* and *Polistes metricus*  
604 (Hymenoptera: Vespidae). *Insectes Sociaux*. 1979;26: 247–251.
- 605 48. Craig R. Evolution of male workers in the Hymenoptera. *J Theor Biol*. 1982;94: 95–105.  
606 doi:10.1016/0022-5193(82)90331-9
- 607 49. Field J, Foster W, Shreeves G, Sumner S. Ecological constraints on independent nesting in  
608 facultatively eusocial hover wasps. *Proc R Soc Lond B Biol Sci*. 1998;265: 973–977.
- 609 50. Mason CA. Division of labor and adult interactions in eusocial colonies of two allodapine bee  
610 species (Hymenoptera: Anthophoridae). *J Kans Entomol Soc*. 1988; 477–491.
- 611 51. Hogendoorn K, Velthuis HHW. Task allocation and reproductive skew in social mass  
612 provisioning carpenter bees in relation to age and size. *Insectes Sociaux*. 1999;46: 198–207.  
613 doi:10.1007/s000400050135
- 614 52. Maeta Y, Sakagami SF. Oophagy and Egg Replacement in Artificially Induced Colonies of a  
615 Basically Solitary Bee, *Ceratina (Ceratinidia) okinawana* (Hymenoptera, Anthophoridae,  
616 Xylocopinae), with a Comparison of Social Behavior among *Ceratina*, *Xylocopa* and the Halictine  
617 Bees. *Jpn J Entomol*. 1995;63: 347–375.
- 618 53. Gerling D, Hurd PD, Hefetz A. Comparative behavioral biology of two Middle East species of  
619 carpenter bees (*Xylocopa* Latreille)(Hymenoptera: Apoidea). Smithsonian Institution Press;  
620 1983.

- 621 54. Leadbeater E, Carruthers JM, Green JP, Rosser NS, Field J. Nest Inheritance Is the Missing  
622 Source of Direct Fitness in a Primitively Eusocial Insect. *Science*. 2011;333: 874–876.  
623 doi:10.1126/science.1205140
- 624 55. Blacher P, Yagound B, Lecoutey E, Devienne P, Chameron S, Châline N. Drifting behaviour as an  
625 alternative reproductive strategy for social insect workers. *Proc R Soc B Biol Sci*. 2013;280:  
626 20131888. doi:10.1098/rspb.2013.1888
- 627 56. Stark RE. Cooperative nesting in the multivoltine large carpenter bee *Xylocopa sulcatipes* Maa  
628 (Apoidea: Anthophoridae): Do helpers gain or lose to solitary females? *Ethology*. 1992;91: 301–  
629 310. doi:10.1111/j.1439-0310.1992.tb00871.x
- 630 57. Schwarz MP, Richards MH, Danforth BN. Changing paradigms in insect social evolution: Insights  
631 from Halictine and Allodapine bees. *Annu Rev Entomol*. 2007;52: 127–150.  
632 doi:10.1146/annurev.ento.51.110104.150950
- 633 58. Chapman NC, Nanork P, Gloag RS, Wattanachaiyingcharoen W, Beekman M, Oldroyd BP.  
634 Queenless colonies of the Asian red dwarf honey bee (*Apis florea*) are infiltrated by workers  
635 from other queenless colonies. *Behav Ecol*. 2009;20: 817–820. doi:10.1093/beheco/arp065
- 636 59. Tallamy DW, Wood TK. Convergence patterns in subsocial insects. *Annu Rev Entomol*. 1986;31:  
637 369–390.
- 638 60. Velthuis HHW, Gerling D. At the brink of sociality: Interactions between adults of the carpenter  
639 bee *Xylocopa pubescens* Spinola. *Behav Ecol Sociobiol*. 1983;12: 209–214.  
640 doi:10.1007/BF00290773
- 641 61. Cartar RV. Morphological senescence and longevity: an experiment relating wing wear and life  
642 span in foraging wild bumble bees. *J Anim Ecol*. 1992; 225–231.
- 643 62. Bouwma AM, Nordheim EV, Jeanne RL. Per-capita productivity in a social wasp: no evidence for  
644 a negative effect of colony size. *Insectes Sociaux*. 2006;53: 412–419.
- 645 63. Richards MH. Colony Social Organisation and Alternative Social Strategies in the Eastern  
646 Carpenter Bee, *Xylocopa virginica*. *J Insect Behav*. 2011;24: 399–411. doi:10.1007/s10905-011-  
647 9265-9
- 648 64. Hogendoorn K, Zammit J. Benefits of cooperative breeding through increased colony survival in  
649 an allodapine bee. *Insectes Sociaux*. 2001;48: 392–397.
- 650 65. Ohkubo Y, Yamamoto T, Ogusu N, Watanabe S, Murakami Y, Yagi N, et al. The benefits of  
651 grouping as a main driver of social evolution in a halictine bee. *Sci Adv*. 2018;4: e1700741.  
652 doi:10.1126/sciadv.1700741
- 653 66. Münster-Swendsen M, Calabuig I. Interaction between the solitary bee *Chelostoma florisomne*  
654 and its nest parasite *Sapyga clavicornis* - empty cells reduce the impact of parasites. *Ecol*  
655 *Entomol*. 2000;25: 63–70.
- 656 67. Rehan SM, Richards MH. Reproductive aggression and nestmate recognition in a subsocial bee.  
657 *Anim Behav*. 2013;85: 733–741. doi:10.1016/j.anbehav.2013.01.010
- 658 68. Vickruck JL, Richards MH. Nestmate discrimination based on familiarity but not relatedness in  
659 eastern carpenter bees. *Behav Processes*. 2017.

660

661

662

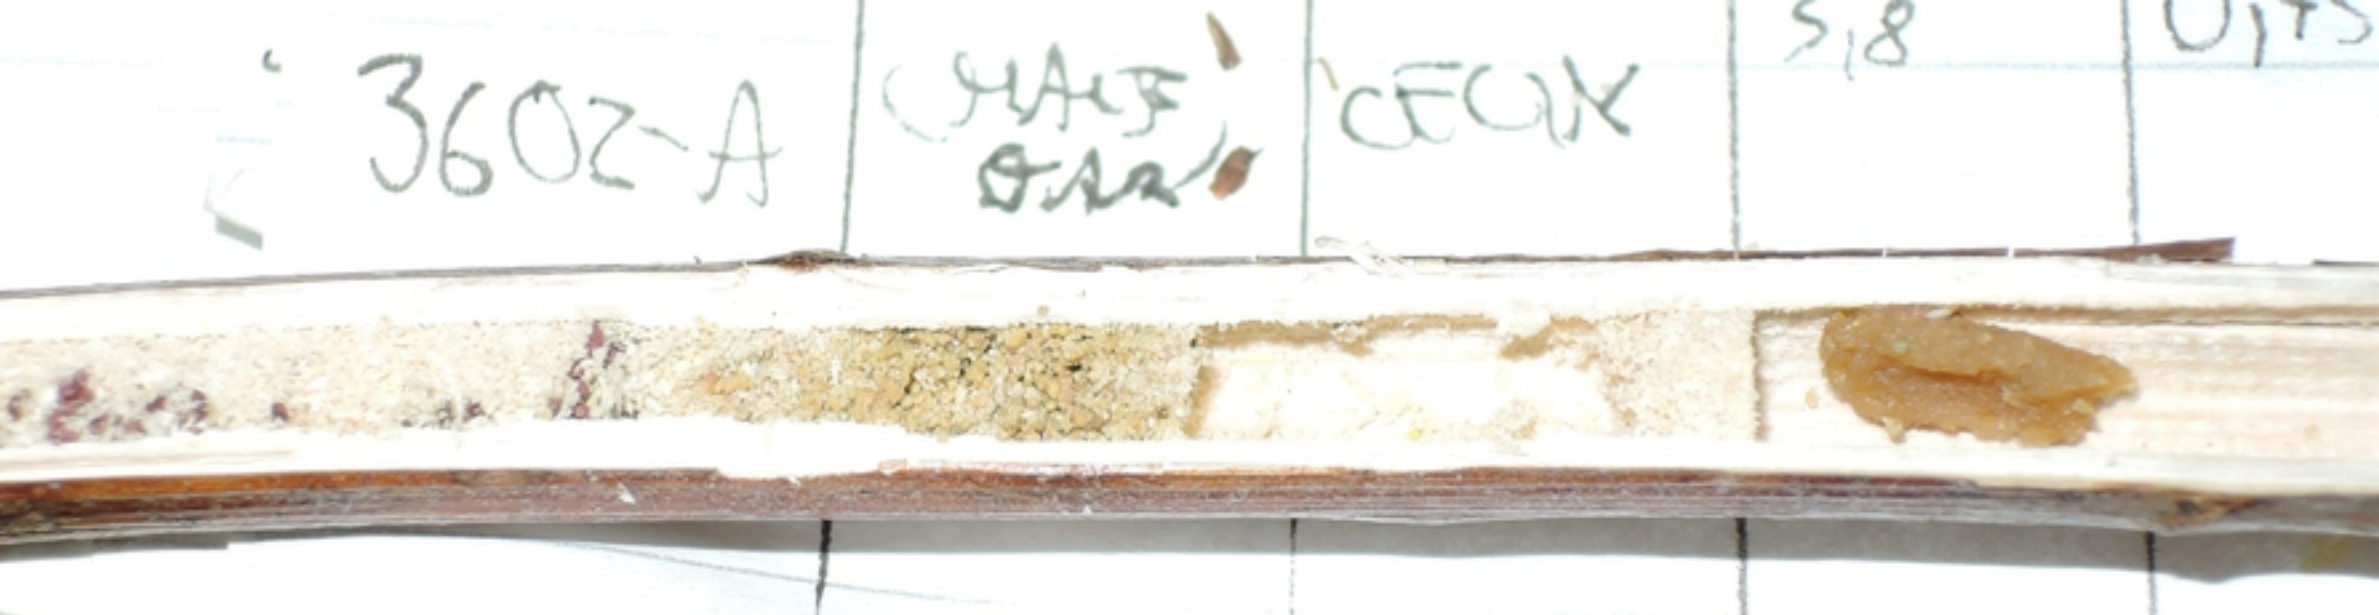

Figure

### Comparisons between old female and not-adult juveniles

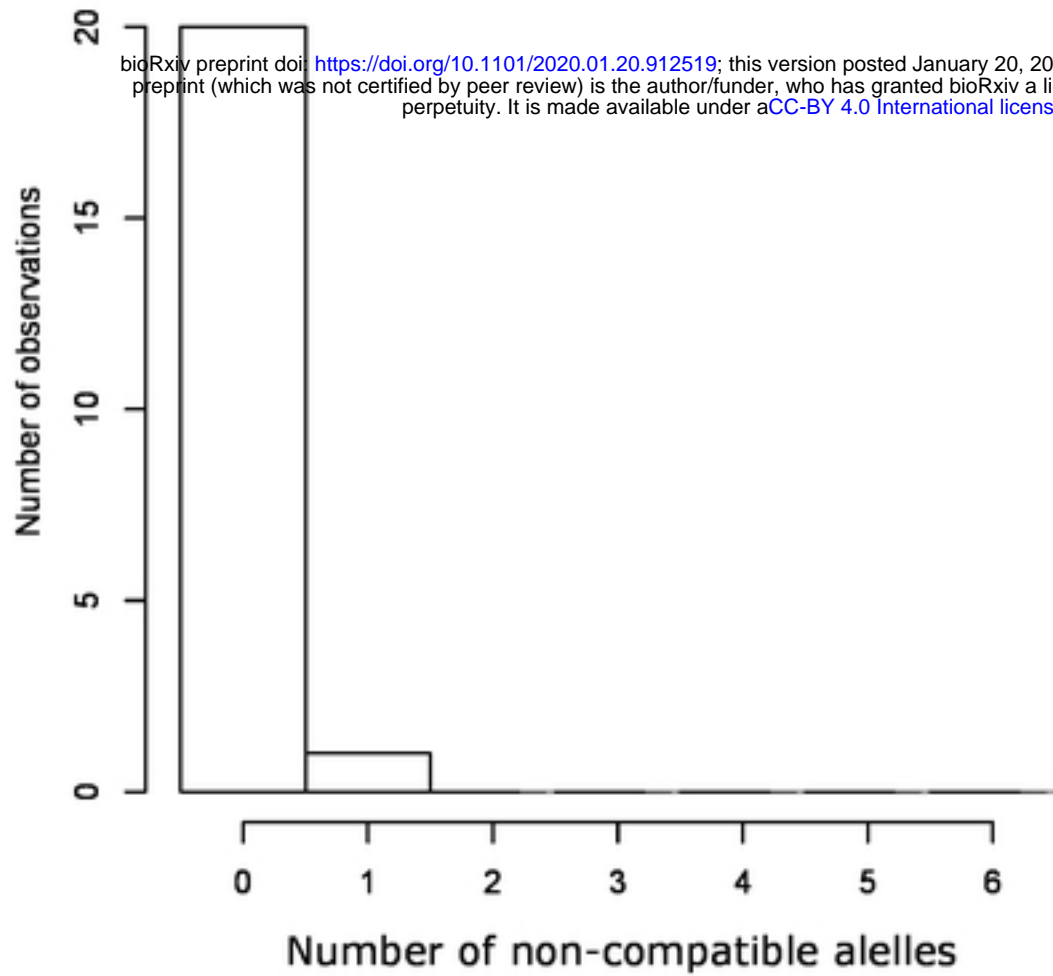

### Comparisons between old female and young adults

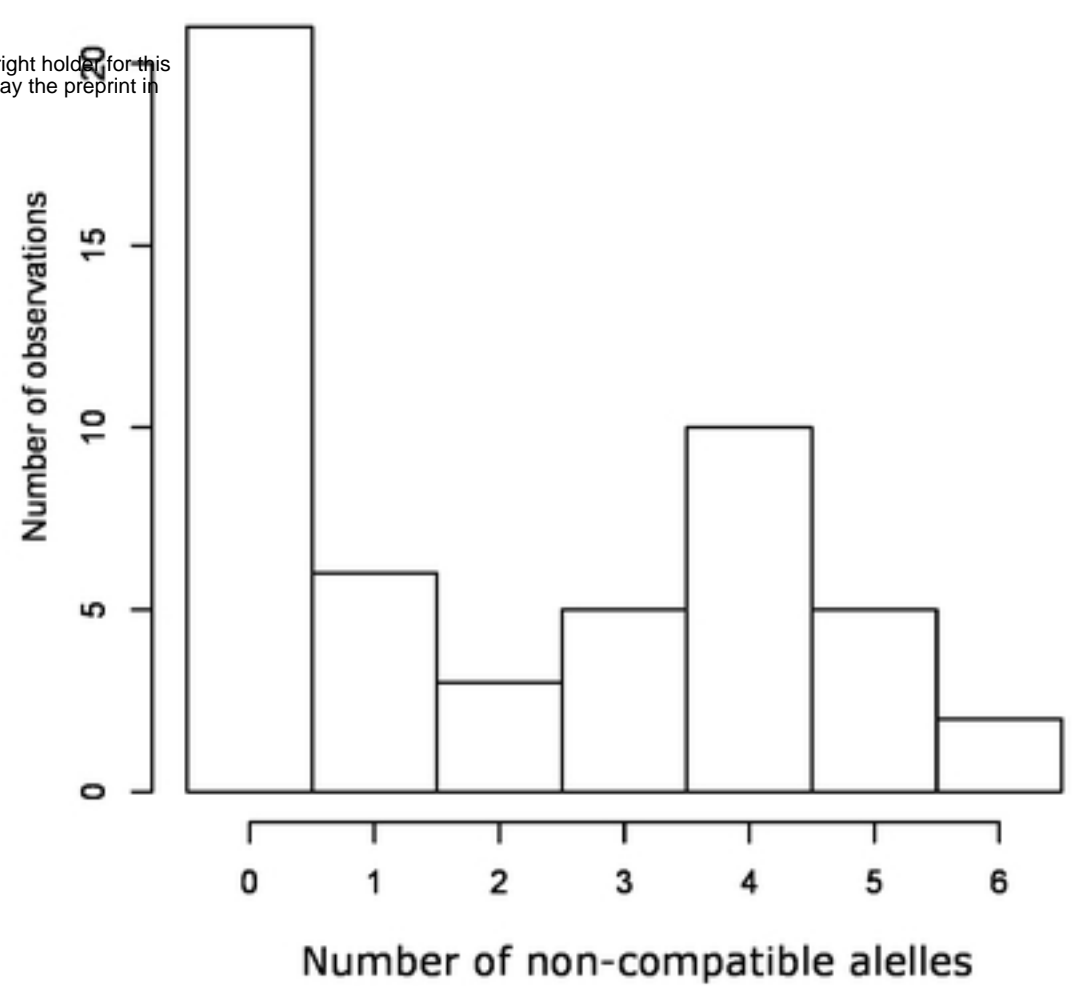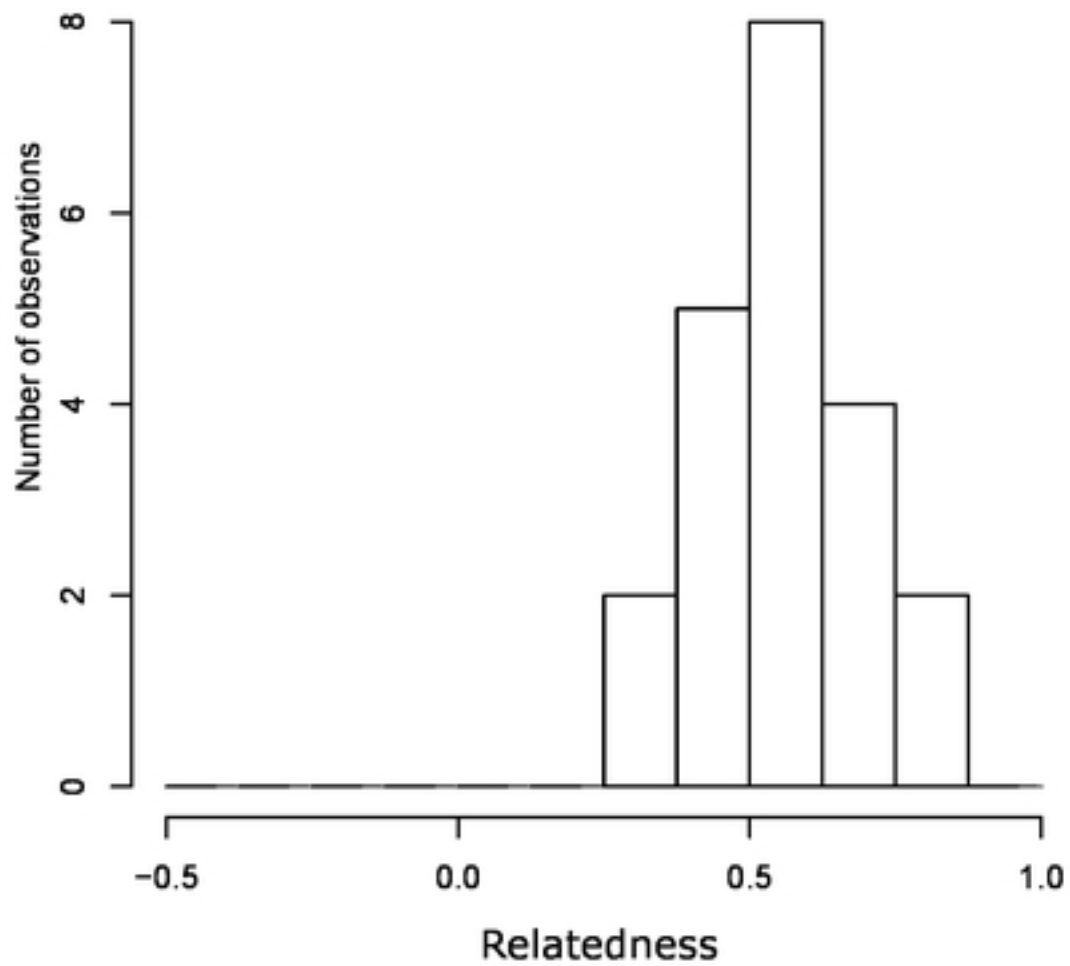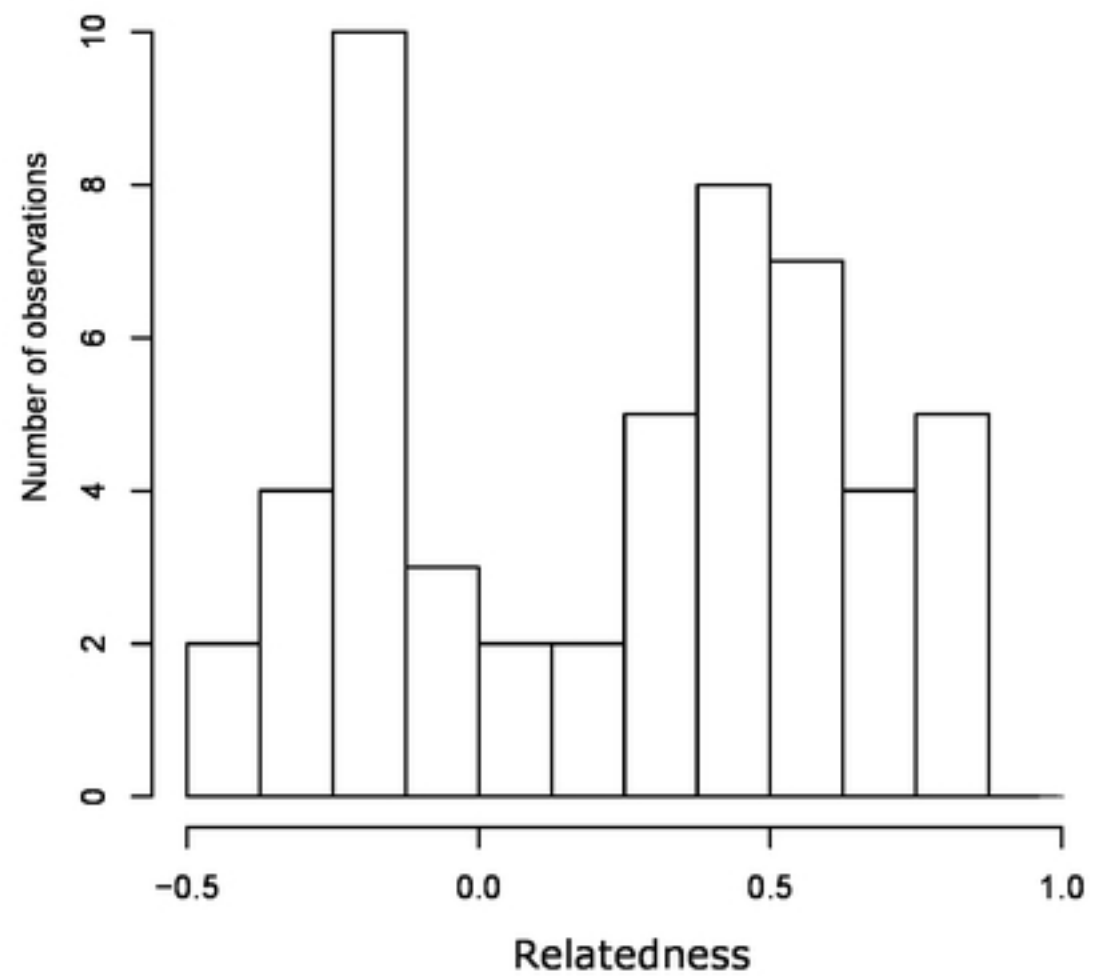

Source: http://biorxiv.org/content/10.1101/2020.01.20.912519v1.full.pdf
